# Supplementary material
Source: ML conference proceedings conference paper supplement (https://openreview.net/forum?id=cLijWz05L2b)
Supplement: supplementary_material [file attachment]

## A Regression Approach and Stochastic traps

A well known vanilla uncertainty-based exploration method consists in predicting future targets  $z_{t+1}$  from a history-representation  $b_t$  of past observations-actions and future open-loop actions  $a_t$  via regression. This method is referred as a one-step prediction error method at the latent-level if  $z_{t+1}$  is a function of the observation or at the observation-level if  $z_{t+1} = o_{t+1}$ . The representation  $b_t$  can be learned via a representation learning method or simply be, in a toy scenario,  $b_t = (o_t, a_{t-1})$ . In any case, using a simple regression technique to compute the intrinsic rewards will lead towards trivial behaviors if the underlying dynamics  $z_{t+1} \sim p(\cdot|b_t, a_t)$  is stochastic. Indeed, let  $g_\theta$  be a parameterized predictor that is trained to predict  $z_{t+1}$  with inputs  $(b_t, a_t)$  with the following regression loss:

$$\mathcal{L}_{\text{Reg}}(\theta, z_{t+1}) = \mathbb{E} [\|z_{t+1} - g_\theta(b_t, a_t)\|_2^2].$$

Then, if  $g_\theta$  is expressive enough, we have:

$$\begin{aligned} \arg \min_{\theta} \mathcal{L}_{\text{Reg}}(\theta, z_{t+1}) &= \mathbb{E}[z_{t+1} | (b_t, a_t)], \\ \min_{\theta} \mathcal{L}_{\text{Reg}}(\theta, z_{t+1}) &= \mathbb{E} [\|z_{t+1} - \mathbb{E}[z_{t+1} | (b_t, a_t)]\|_2^2] = \text{Var}[z_{t+1} | (b_t, a_t)]. \end{aligned}$$

As the intrinsic rewards are derived from the prediction loss, we see that when the loss is minimized, we introduce the variance of the future-target distribution in the intrinsic rewards. This added variance is problematic because it encourages the agent to seek for states with uncertain future outcomes and stay there. Those states are known as stochastic traps.

## B General BYOL-Explore and BLaDE Architecture

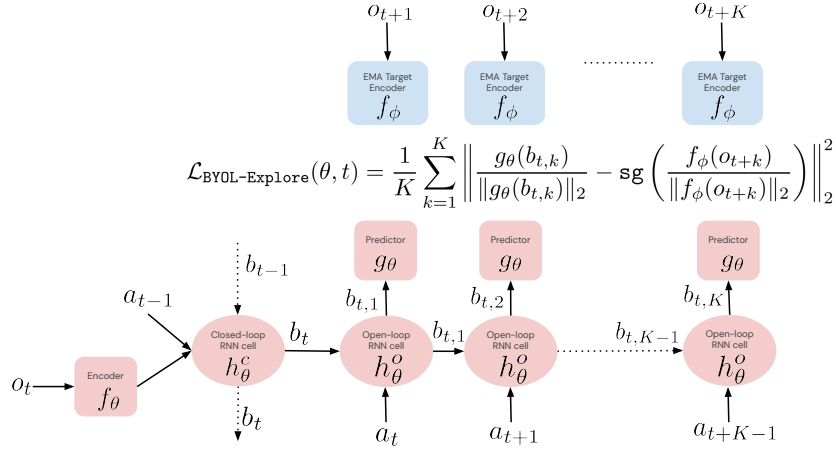

Figure 10: BYOL-Explore's Neural Architecture.

The online network is composed of:

- Encoder:  $f_\theta : \mathcal{O} \rightarrow \mathbb{R}^N$
- Close-loop RNN cell:  $h_\theta^c : \mathbb{R}^M \times \mathbb{R}^N \times \mathcal{A} \rightarrow \mathbb{R}^M$
- Open-loop RNN cell:  $h_\theta^o : \mathbb{R}^M \times \mathcal{A} \rightarrow \mathbb{R}^M$
- In the case of BYOL-Explore, the predictor is:  $g_\theta : \mathbb{R}^M \rightarrow \mathbb{R}^N$
- In the case of BLaDE the predictor is:  $g_\theta : \mathbb{R}^{M+N+L} \rightarrow \mathbb{R}^N$

The target network is composed of:

- EMA encoder:  $f_\phi : \mathcal{O} \rightarrow \mathbb{R}^N$

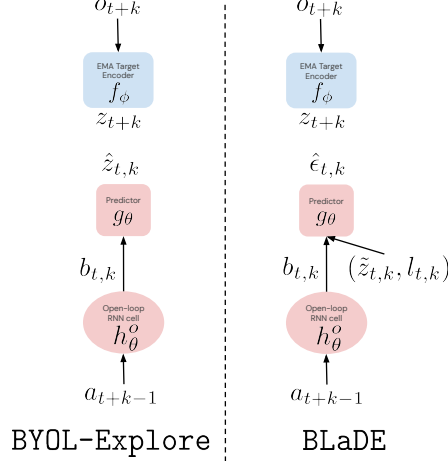

Figure 11: BLADE’s and BYOL-Explore’s predictor architectures.

### B.1 Detailed BYOL-Explore and BLADE architecture for Atari

In Atari, the size of the observation-representation  $N = 512$  and the size of the history-representation  $M = 256$ .

- Encoder:  $f_\theta : \mathcal{O} \rightarrow \mathbb{R}^N$ : The encoder is instantiated as a Deep ResNet [12] stack. The greyscale image observation is passed through a stack of 3 units, each comprised of a  $3 \times 3$  convolutional layer, a  $3 \times 3$  maxpool layer, and 2 residual blocks. The number of channels for the convolutional layer and the residual blocks are 16, 32, and 32 within each of the 3 units respectively. We use GroupNorm normalization [31] with one group at the end of each of the 3 units, and use ReLU activations everywhere. The output of the final residual block is flattened and projected using a single linear layer to an embedding of dimension 512.
- Close-loop RNN cell:  $h_\theta^c : \mathbb{R}^M \times \mathbb{R}^N \times \mathcal{A} \rightarrow \mathbb{R}^M$  is a simple Gated Recurrent Unit (GRU) [5]. We provide the past-action to the close-loop RNN cell, embedded into a representation of size 32.
- Open-loop RNN cell:  $h_\theta^o : \mathbb{R}^M \times \mathcal{A} \rightarrow \mathbb{R}^M$  is a simple Gated Recurrent Unit. We provide the past-action to the open-loop RNN cell, embedded into a representation of size 32.
- Policy head  $\pi_\psi : \mathbb{R}^N \rightarrow \mathbb{R}^{|\mathcal{A}|}$ , value head  $v_\psi : \mathbb{R}^N \rightarrow \mathbb{R}$ . The outputs of the policy head are passed through a softmax layer to form the probabilities for each action to be taken.
- The predictor for BYOL-Explore  $g_\theta : \mathbb{R}^M \rightarrow \mathbb{R}^N$  is a simple Multi-Layer Perceptron (MLP) with three hidden layer of size (512, 512, 512).
- The predictor for BLADE  $g_\theta : \mathbb{R}^{M+N+L} \rightarrow \mathbb{R}^N$  is a simple Multi-Layer Perceptron (MLP) with three hidden layer of size (512, 512, 512).

### B.2 Details of Reward Normalization Mechanism

We use a similar reward normalization scheme as in RND [4] and normalize the raw rewards  $((\ell_t^j)_{t=0}^{T-2})_{j=0}^{B-1}$  by an EMA estimate of their standard deviation.

More precisely, we first set the EMA mean to  $\bar{r} = 0$ , the EMA mean of squares to  $\bar{r}^2 = 0$  and the counter to  $c = 1$ . Then, for the  $c$ -th batch of raw rewards  $((\ell_t^j)_{t=0}^{T-2})_{j=0}^{B-1}$ , we compute the batch mean  $\bar{r}_c$  and the batch mean of squares  $\bar{r}_c^2$ :

$$\bar{r}_c = \frac{1}{B(T-1)} \sum_{j=0}^{B-1} \sum_{t=0}^{T-2} \ell_t^j, \quad \bar{r}_c^2 = \frac{1}{B(T-1)} \sum_{j=0}^{B-1} \sum_{t=0}^{T-2} (\ell_t^j)^2.$$

448 We then update  $\bar{r}$ ,  $\bar{r}^2$  and  $c$ :

$$\bar{r} \leftarrow \alpha_r \bar{r} + (1 - \alpha_r) \bar{r}_c, \quad \bar{r}^2 \leftarrow \alpha_r \bar{r}^2 + (1 - \alpha_r) \bar{r}_c^2, \quad c \leftarrow c + 1,$$

449 where  $\alpha_r = 0.99$ . We compute the adjusted EMA mean  $\mu_r$ , the adjusted EMA mean of squares  $\mu_{r^2}$ :

$$\mu_r = \frac{\bar{r}}{1 - \alpha_r^c}, \quad \mu_{r^2} = \frac{\bar{r}^2}{1 - \alpha_r^c}.$$

450 Finally the EMA estimation of the standard deviation is  $\sigma_r = \sqrt{\max(\mu_{r^2} - \mu_r^2, 0) + \epsilon}$ , where  
 451  $\epsilon = 10^{-8}$  is a small numerical regularization. The normalized rewards are  $r_{i,t}^j = \ell_t^j / \sigma_r$ .

## 452 C Baselines

453 **Random Network Distillation (RND) [4]** is a simple exploration method that consists in training  
 454 an encoder such that its outputs fit the outputs of *another* fixed and randomly initialized encoder and  
 455 using the training loss as an intrinsic reward to be optimized by an RL algorithm. More precisely,  
 456 let  $N \in \mathbb{N}^*$  be the embedding size and let us note  $f_\theta : \mathcal{O} \rightarrow \mathbb{R}^N$  the encoder, also called predictor  
 457 network, with trainable weights  $\theta$  and  $f_\phi : \mathcal{O} \rightarrow \mathbb{R}^N$  the fixed and randomly initialized encoder,  
 458 also called target network, with fixed weights  $\phi$ . In addition, let us suppose that we have a batch of  
 459 trajectories  $\left( (o_t^j, a_t^j)_{t=0}^{T-1} \right)_{j=0}^{B-1}$  collected by our RL agent, then the loss  $\mathcal{L}_{\text{RND}}(\theta)$  to minimize w.r.t.  
 460 the online network parameters is defined as:

$$\mathcal{L}_{\text{RND}}(\theta, j, t) = \|f_\theta(o_t^j) - \text{sg}(f_\phi(o_t^j))\|_2^2, \quad \mathcal{L}_{\text{RND}}(\theta) = \frac{1}{BT} \sum_{j=0}^{B-1} \sum_{t=0}^{T-1} \mathcal{L}_{\text{RND}}(\theta, j, t),$$

461 and the unnormalized reward associated to the transition  $(o_t^j, a_t^j, o_{t+1}^j)$  is defined as  $\ell_t^j = \mathcal{L}_{\text{RND}}(\theta, j, t+1)$   
 462 where  $0 \leq t \leq T-2$ . To obtain the final intrinsic rewards, we just normalize them to be as  
 463 close as possible to the original RND implementation:  $r_{i,t}^j = \frac{\ell_t^j}{\sigma_r}$ .

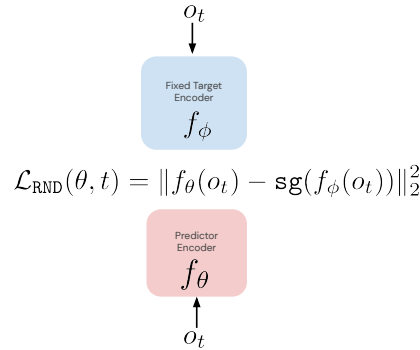

Figure 12: RND's Neural Architecture.

464 **Intrinsic Curiosity Module (ICM) [24]** is a one-step prediction error method at the latent level.  
 465 It consists in training an encoder  $f_\theta : \mathcal{O} \rightarrow \mathbb{R}^N$  that outputs a representation that is robust to  
 466 uncontrollable aspects of the environment and then use this representation as inputs of a one-step  
 467 prediction error model  $g_\phi : \mathbb{R}^N \times \mathcal{A} \rightarrow \mathbb{R}^N$  which error is used as an intrinsic reward to be optimized  
 468 by an RL algorithm. To build a representation robust to uncontrollable dynamics, the idea used in ICM  
 469 is to train an inverse dynamics model  $p_\theta : \mathbb{R}^N \times \mathcal{R}^N \rightarrow \mathcal{A}$  that predicts the distribution of actions  
 470 that led to the transition between two consecutive representations  $f_\theta(o_t), f_\theta(o_{t+1})$ . More precisely,

471 let us suppose that we have a batch of trajectories  $\left((o_t^j, a_t^j)_{t=0}^{T-1}\right)_{j=0}^{B-1}$  collected by our RL agent, then  
 472 the loss  $\mathcal{L}_{\text{INV}}(\theta)$  to minimize in order to train our encoder and inverse dynamcis model is:

$$\mathcal{L}_{\text{INV}}(\theta, j, t) = -\ln \left( p_{\theta}(a_t^j | f_{\theta}(o_t^j), f_{\theta}(o_{t+1}^j)) \right), \quad \mathcal{L}_{\text{INV}}(\theta) = \frac{1}{B(T-1)} \sum_{j=0}^{B-1} \sum_{t=0}^{T-2} \mathcal{L}_{\text{INV}}(\theta, j, t),$$

473 which is a simple cross-entropy loss. Simultaneously, ICM also trains the one step prediction error  
 474 model by minimizing the following one-step prediction loss:

$$\mathcal{L}_{\text{ICM}}(\phi, j, t) = \|g_{\phi}(f_{\theta}(o_t^j), a_t^j) - \text{sg}(f_{\theta}(o_{t+1}^j))\|_2^2, \quad \mathcal{L}_{\text{ICM}}(\phi) = \frac{1}{B(T-1)} \sum_{j=0}^{B-1} \sum_{t=0}^{T-2} \mathcal{L}_{\text{ICM}}(\phi, j, t),$$

475 and the unnormalized reward associated to the transition  $(o_t^j, a_t^j, o_{t+1}^j)$  is defined as  $\ell_t^j = \mathcal{L}_{\text{ICM}}(\theta, j, t)$   
 476 where  $0 \leq t \leq T-2$ . To obtained the final intrinsic rewards, we just normalize them :  $r_{i,t}^j = \frac{\ell_t^j}{\sigma_r}$ .

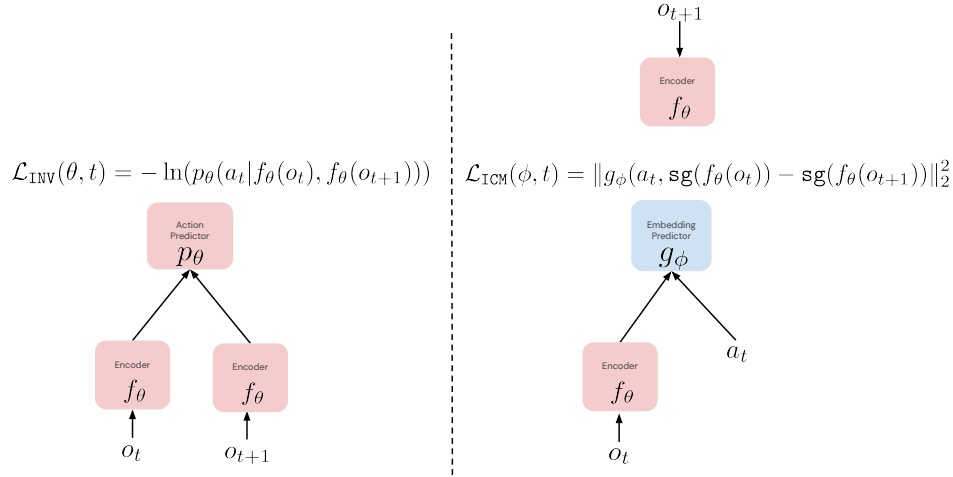

Figure 13: ICM's Neural Architecture.

## 477 D Hyperparameter Settings

478 After normalizing the rewards, we rescale them by  $1 - \gamma$ . We similarly use PopArt normalization  
479 on the output of the value network. We choose an horizon  $K = 8$ . We use a discount factor of  
480  $\gamma = 0.999$ . To train the value function, we use VTrace [8] without offpolicy corrections to define  
481 TD targets for MSE loss with a loss weight of 0.5. We add an entropy loss with a loss weight of  
482 0.001. The VMPO parameters  $\eta_{init}$  and  $\alpha_{init}$  are initialized to 0.5.  $\epsilon_\eta$  and  $\epsilon_\alpha$  are set to 0.01 and  
483 0.005 respectively. We scale the BYOL loss by a factor of 5.0 when combining losses. The VMPO  
484 top-k parameter is set to 0.5. We use the Adam optimizer with learning rate  $10^{-4}$  and  $b_1 = 0.9$ . The  
485 target network for VMPO is updated every 10 learner steps.

486 We use a batch size of 32 and a sequence length of 128; and a distributed learning setup using 4  
487 TPUv2 for learning and 400 CPU actors for generating data via another inference server using 4  
488 TPUv2 to evaluate the policy, similar to Agent57 [1].
